# The Mincle-Activating Adjuvant TDB Induces MyD88-Dependent Th1 and Th17 Responses through IL-1R Signaling

Christiane Desel<sup>1\*</sup>, Kerstin Werninghaus<sup>1</sup>, Manuel Ritter<sup>2</sup>, Katrin Jozefowski<sup>1</sup>, Jens Wenzel<sup>1</sup>, Norman Russkamp<sup>1</sup>, Ulrike Schleicher<sup>1</sup>, Dennis Christensen<sup>3</sup>, Stefan Wirtz<sup>4</sup>, Carsten Kirschning<sup>5</sup>, Else Marie Agger<sup>3</sup>, Clarissa Prazeres da Costa<sup>2</sup>, Roland Lang<sup>1\*</sup>

**1** Institute of Clinical Microbiology, Immunology and Hygiene, University Hospital Erlangen, Erlangen, Germany, **2** Institute of Medical Microbiology, Immunology and Hygiene, Technische Universität München, Munich, Germany, **3** Statens Serum Institut, Department of Infectious Disease Immunology, Copenhagen, Denmark, **4** Medical Clinic 1, Gastroenterology, Pneumology and Endocrinology, University Hospital Erlangen, Erlangen, Germany, **5** Institut für Medizinische Mikrobiologie, Essen, Germany

## Abstract

Successful vaccination against intracellular pathogens requires the generation of cellular immune responses. Trehalose-6,6-dibehenate (TDB), the synthetic analog of the mycobacterial cord factor trehalose-6,6-dimycolate (TDM), is a potent adjuvant inducing strong Th1 and Th17 immune responses. We previously identified the C-type lectin Mincle as receptor for these glycolipids that triggers the FcR $\gamma$ -Syk-Card9 pathway for APC activation and adjuvanticity. Interestingly, *in vivo* data revealed that the adjuvant effect was not solely Mincle-dependent but also required MyD88. Therefore, we dissected which MyD88-dependent pathways are essential for successful immunization with a tuberculosis subunit vaccine. We show here that antigen-specific Th1/Th17 immune responses required IL-1 receptor-mediated signals independent of IL-18 and IL-33-signaling. ASC-deficient mice had impaired IL-17 but intact IFN $\gamma$  responses, indicating partial independence of TDB adjuvanticity from inflammasome activation. Our data suggest that the glycolipid adjuvant TDB triggers Mincle-dependent IL-1 production to induce MyD88-dependent Th1/Th17 responses *in vivo*.

**Citation:** Desel C, Werninghaus K, Ritter M, Jozefowski K, Wenzel J, et al. (2013) The Mincle-Activating Adjuvant TDB Induces MyD88-Dependent Th1 and Th17 Responses through IL-1R Signaling. PLoS ONE 8(1): e53531. doi:10.1371/journal.pone.0053531

**Editor:** Olivier Neyrolles, Institut de Pharmacologie et de Biologie Structurale, France

**Received:** July 17, 2012; **Accepted:** December 3, 2012; **Published:** January 7, 2013

**Copyright:** © 2013 Desel et al. This is an open-access article distributed under the terms of the Creative Commons Attribution License, which permits unrestricted use, distribution, and reproduction in any medium, provided the original author and source are credited.

**Funding:** This work was supported by grants from the Deutsche Forschungsgemeinschaft (SFB796 to RL and SFB/TR22 to CPdP) and the European Union (FP6 NEWTBVAC to EMA, DC and RL). The funders had no role in study design, data collection and analysis, decision to publish, or preparation of the manuscript.

**Competing Interests:** CAF01 is currently in clinical development at Statens Serum Institut and three clinical phase 1 studies have been conducted successfully. With regards to the intellectual property status on CAF01, the Statens Serum Institut has one issued patent (WO2006002642). None of the coauthors are registered as inventors on the patent and the full right has been transferred to Statens Serum Institut. EMA and/or DC are furthermore coinventors on patents on related technologies (WO2005004911A2, WO2009003474, WO2010054654, PCT/DK2012/000080) for all of which the full right has been transferred to Statens Serum Institut. This does not alter the authors' adherence to the PLOS ONE policies on sharing data and materials.

\* E-mail: [christiane.desel@uk-erlangen.de](mailto:christiane.desel@uk-erlangen.de) (CD); [roland.lang@uk-erlangen.de](mailto:roland.lang@uk-erlangen.de) (RL)

## Introduction

Recombinant subunit vaccines are cheap and safe, but only weakly immunogenic unless adjuvants are used. The most commonly used human adjuvant Aluminium hydroxide (Alum) potently induces antibody responses but does not induce Th1 cellular immunity. Thus, new adjuvants are urgently needed to potentiate cell-mediated immune (CMI) responses crucial for protection against intracellular bacteria, e.g. *Mycobacterium tuberculosis*. A prerequisite for an efficient adjuvant is the activation of antigen presenting cells (APCs) by ligands for pattern recognition receptors. The choice of adjuvant(s) critically determines the type of memory response elicited, depending on the receptors and pathways triggered in APC *via* generation of cytokine milieu directing Th cell differentiation. E.g., the TLR9 ligand CpG ODN drives strong Th1 responses, whereas cationic dimethyldioctadecylammonium (DDA) liposomes containing the glycolipid trehalose-6,6-dibehenate (TDB), the synthetic analog of the mycobacterial cord factor trehalose-6,6-dimycolate, potently induce a strong Th17 in addition to Th1 immune response [1,2]. DDA/TDB (also known as CAF01) is a next

generation adjuvant and has entered clinical studies for vaccination with the recombinant *Mycobacterium tuberculosis* fusion protein Ag85B-ESAT-6 (H1) [3,4]. We and others [5] identified the C-type lectin (CLR) Mincle as receptor for these glycolipids that triggers the FcR $\gamma$ -Syk-Card9 pathway for APC activation and adjuvanticity [6]. *In vitro*, APC activation was solely dependent on recognition of TDB by Mincle, whilst MyD88 was dispensable. Surprisingly, TDB-immunized MyD88<sup>-/-</sup> mice failed to mount antigen-specific Th1 immune responses [7]. Since this was unexpected and contradictory to our *in vitro* results, we investigated *in vivo* requirements of known MyD88-utilizing signaling events in immunization experiments using DDA/TDB and H1. Development of antigen-specific Th1 and Th17 immune responses was dependent on IL-1/IL-1R-mediated signals. Interestingly, inflammasome activation *via* ASC only partially accounted for CMI induction upon immunization with the glycolipid-containing adjuvant DDA/TDB.

## Results

### Mincle and MyD88 are Required for Induction of Th1 and Th17 Responses *in vivo*

We have previously shown that the cationic liposome formulation DDA/TDB induces not only a strong Th1 immune response but also a Th17 response [2]. Vaccination with DDA/TDB induces stable, long-lived multifunctional CD4 memory T cells [8,9]. We also found IFN $\gamma$  and IL-17 secreted predominantly by CD4 T cells upon re-stimulation, while contribution of innate cells to IL-17 release was negligible (Fig. S1). This adjuvant effect depended on recognition of the synthetic glycolipid TDB by the CLR Mincle, when analyzed 7 days after a single subcutaneous (s.c.) immunization at the base of tail [6]. Here, we performed s.c. footpad prime-boost immunizations in order to utilize local swelling as an additional readout. Substantial swelling, peaking 7 days post immunization, was observed and significantly reduced in the absence of Mincle (Fig. 1A). This was in line with dramatically reduced secretion of IFN $\gamma$  and IL-17 upon antigen-specific restimulation with H1 protein (Fig. 1B, C). Formation of H1-specific IgG2a antibodies, associated with Th1 responses, was also reduced whereas Th2 polarized IgG1 antibodies developed independently of Mincle (Fig. 1D, E). Footpad swelling was also significantly reduced in the absence of MyD88 (Fig. 1F), as well as IFN $\gamma$  (Fig. 1G) and IL-17 (Fig. 1H) secretion. In addition, H1-specific IgG2a antibody generation was strongly impaired in the absence of MyD88, whereas the reduction of H1-specific IgG1 was not significant (Fig. 1I, J). Thus, in contrast to *in vitro* APC activation which solely required Mincle, *in vivo* adjuvanticity also strongly depends on MyD88 signaling.

Expression of Mincle by macrophages is inducible *in vitro* by TLR stimuli [10]. Therefore, it was possible that MyD88<sup>-/-</sup> mice have reduced Mincle levels due to a lack of responsiveness to TLR signals, derived e.g. from the gut flora, which could account for abrogated inflammatory and immune responses observed in MyD88<sup>-/-</sup> mice after immunization. To test this possibility, we first measured Mincle expression by qRT-PCR in FACS-sorted monocytes, neutrophils and T cells from naive C57BL/6 and MyD88-deficient mice (Fig. 2A). Expression was much higher in neutrophils than in monocytes, whereas T cells expressed very

little Mincle mRNA. Of note, expression in monocytes and neutrophils was equally high in MyD88<sup>-/-</sup> as in control cells. Expression of Mincle was also determined at the site of injection (Fig. 2B). In naive C57BL/6 and MyD88<sup>-/-</sup> mice, Mincle mRNA was nearly undetectable but increased more than 3 orders of magnitude in both genotypes, most likely reflecting the infiltration by inflammatory leukocytes. Thus, absence of the adjuvant effect in MyD88<sup>-/-</sup> mice cannot be attributed to a lack of Mincle expression.

Since MyD88 is the common adaptor molecule in TLR-mediated signaling, we analyzed TLR2,3,4,7 quadruple knockout and TLR9<sup>-/-</sup>, all of which responded normally to immunization with TDB (Fig. S2). Since TLR2 pairs with TLR1 and TLR6, these experiments addressed seven of the eleven murine TLRs. As TLR5 binds flagellin, TLR8 is non-functional in mice, and TLR11 is the receptor for toxoplasma profilin, we consider it unlikely, that TLR-dependent signaling is required for DDA/TDB adjuvanticity *in vivo*. However, we cannot formally exclude that one or more of these TLRs contribute to the DDA/TDB effect.

### IL-1 Receptor Signaling Mediates Th1 and Th17 Cell Induction

MyD88 also conveys signaling of the receptors for IL-1, IL-18 and IL-33 [11–14]. TDB induces the expression and secretion of IL-1 $\beta$  from macrophages *in vitro* [2]. We therefore analyzed IL-1 expression at the site of injection and detected increased mRNA levels of *Il1b* and to a lesser extent also *Il1a* in the feet 3 days post immunization (Fig. 3A). These changes at the mRNA level were at least in part due to leukocyte infiltration, as neutrophils constitutively express *Il1a* and *Il1b* (Fig. 3B). Importantly, cells isolated from footpads 7 days post immunization secreted IL-1 $\beta$  after over night incubation in culture medium (Fig. 3C). This was strongly dependent on Mincle and MyD88.

To assess the contribution of IL-1 receptor signals to adjuvanticity of TDB, we next investigated whether blockade of IL-1R with the soluble IL-1 receptor antagonist Anakinra influences the outcome of immunization. Anakinra treatment did not affect footpad swelling (Fig. 4A), but significantly reduced IFN $\gamma$  and IL-17 secretion (Fig. 4B, C). Even though the serum concentration of Anakinra was consistently high in all mice treated (Fig. 4D), we do not know whether Anakinra

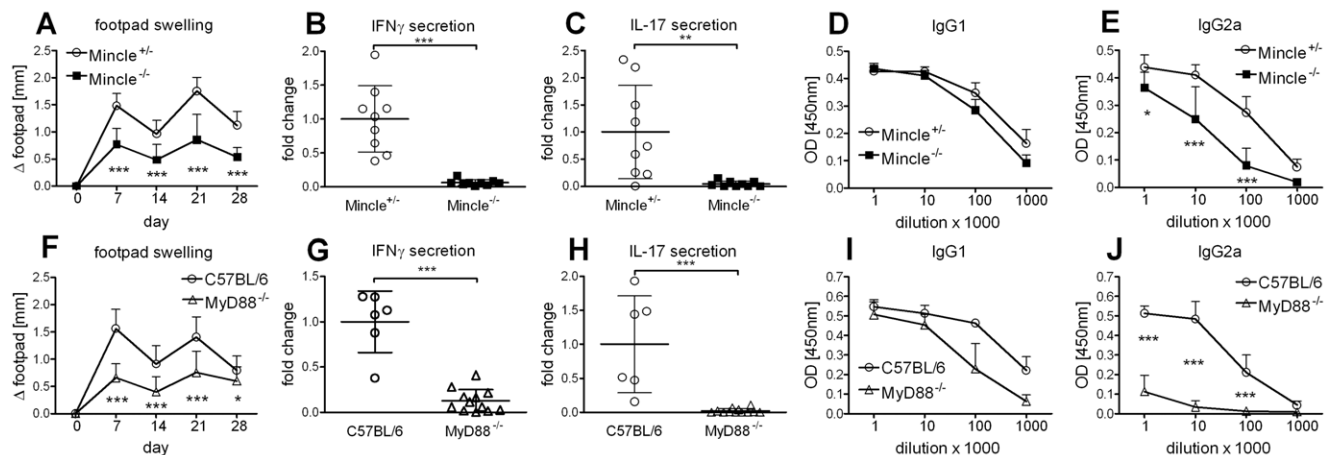

**Figure 1. Mincle and MyD88 are required for DDA/TDB adjuvanticity.** Footpad swelling (A), IFN $\gamma$ , IL-17 (B, C) secretion and H1-specific antibodies (D, E) in Mincle<sup>-/-</sup> and littermate controls. Data presented as mean  $\pm$  SD pooled from 2 independent experiments with 4-5 mice/group. Footpad swelling (F), IFN $\gamma$ , IL-17 (G, H) secretion and H1-specific antibodies (I, J) in MyD88<sup>-/-</sup> and C57BL/6 controls. Data presented as mean  $\pm$  SD pooled from 3 independent experiments with 2-5 mice/group. Cytokine production of cells isolated from the draining lymph nodes. doi:10.1371/journal.pone.0053531.g001

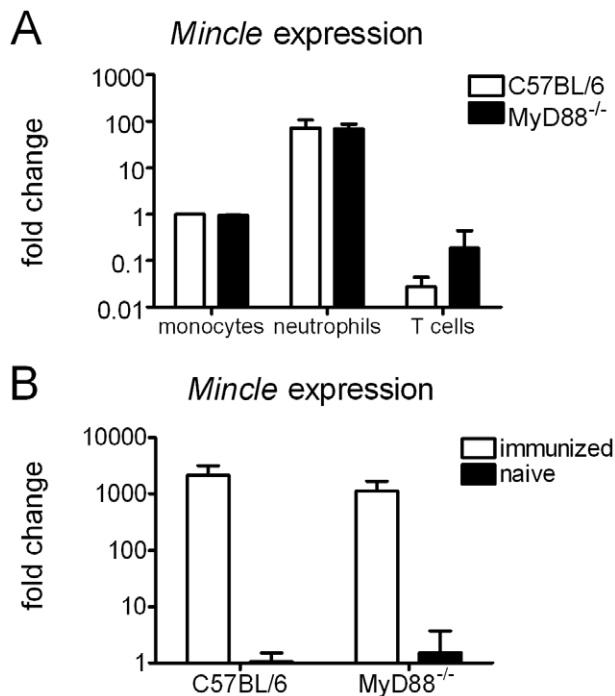

**Figure 2. Basal and DDA/TDB-induced Mincle expression is not reduced in the absence of MyD88.** Mincle expression determined by qRT-PCR in sorted cells from naive C57BL/6 or MyD88<sup>-/-</sup> mice (A). Fold change calculated against sorted monocytes from C57BL/6 mice. Data presented as mean  $\pm$  SD pooled from 2 independent sorts. Mincle expression determined by qRT-PCR in vaccinated and naive mice (B). RNA isolated from footpads 3 days post immunization. Fold change calculated against naive C57BL/6. Data presented as mean  $\pm$  SD pooled from 2 independent experiments with 2–3 mice/group. doi:10.1371/journal.pone.0053531.g002

treatment completely inhibited IL-1-mediated signaling. Therefore, we immunized IL-1R1<sup>-/-</sup> mice with DDA/TDB/H1. Due to differences in animal protection regulations in the different animal facilities, IL-1R1<sup>-/-</sup> mice were vaccinated s.c. at the tail base. Requirement for IL-1-mediated signals was more pronounced in these experiments as compared to short term Anakinra treatment. Cytokine secretion was significantly reduced (Fig. 4E, F); albeit not as strongly as seen in MyD88<sup>-/-</sup> mice. Interestingly, even though antibody generation was dependent on MyD88 signaling, absence of IL-1R1 did not alter IgG2a and only marginally affected IgG1 antibody formation (Fig. 4G, H). Thus, IL-1/IL-1R1 signaling contributes to the development of a Th1/Th17 immune response upon immunization with a CLR triggering adjuvant without strong effects on B cell responses or isotype switching.

### IL-18 and IL-33 are Dispensable for Adjuvanticity

We next immunized IL-18<sup>-/-</sup> mice. Footpad swelling was significantly reduced (Fig. 5A), however IL-18 signaling was not required for Th1/Th17 response induction (Fig. 5B). Development of humoral immune responses remained also unchanged in the absence of IL-18 (Fig. 5C). Thus, contribution of IL-18/IL-18R signaling was rather negligible although it does mediate local inflammation at the injection site. Finally, in mice deficient in the IL-33 receptor component ST2, footpad swelling and secretion of IFN $\gamma$  and IL-17 were not impaired after immunization (Fig. 5D, E).

### Canonical Inflammasome Activation Contributes to Th17 but not Th1 Responses

IL-1 $\beta$  and IL-18 have to be cleaved in order to exert their proinflammatory effects. This is mediated by caspase-1 in a process called inflammasome activation [15,16]. Since IL-1-mediated signaling contributed to DDA/TDB adjuvanticity, we asked whether inflammasome activation was also a requirement for the adjuvant effect. An essential adapter protein for inflammasome activation is ASC. To address the control of IL-1 production in response to the glycolipid adjuvant, we first stimulated bone marrow-derived DC from ASC<sup>-/-</sup> as well as Mincle<sup>-/-</sup> and MyD88<sup>-/-</sup> mice *in vitro*. Stimulation of DC with TDB induced expression of *Il1a*, *Il1b* and of *Csf3* (encoding G-CSF) with complete dependence on Mincle, but independent of MyD88 and ASC (Fig. S3A). At the protein level, IL-1 $\beta$  was detected in the supernatant in a Mincle- and ASC-dependent, albeit MyD88-independent manner, whereas IL-1 $\alpha$  protein was absent in Mincle<sup>-/-</sup> DC cultures, but independent of ASC (Fig. S3B). Of note, while *Il1a* and *Il1b* mRNA induction was triggered by immobilized TDB as well as by TDB in suspension, both IL-1 proteins were secreted only when DC were stimulated with the particulate TDB in suspension (Figure S3A, B), indicating that phagocytosis of glycolipids is a prerequisite for ASC-dependent release of IL-1 $\beta$  as well as the ASC-independent secretion of IL-1 $\alpha$ .

ASC was shown to fulfil an important inflammasome-independent function in post-transcriptional regulation of cytoskeletal rearrangements and lack of ASC impaired antigen uptake and priming capacity of bone marrow-derived DC as well as chemotaxis of lymphocytes; all due to absent Dock2-signals [17]. Recently, the same group reported that not all of the different ASC<sup>-/-</sup> mouse lines available show defective Dock2 expression [18]; likely resulting in differences regarding the antigen presentation and migratory capacity of lymphoid and myeloid cells. We have used the ASC<sup>-/-</sup> mice originally generated at Genentech [19] and detected comparable Dock2 expression by qRT-PCR (data not shown). We tested ASC<sup>-/-</sup> bone marrow-derived macrophages in phagocytosis and spreading assays and found both unimpaired (Figure S4), arguing against an inflammasome-independent requirement for ASC in TDB-mediated adjuvanticity.

We next investigated the impact of ASC-deficiency on adjuvanticity *in vivo* (Fig. 6). Following footpad immunization of ASC<sup>-/-</sup> mice, local swelling and induction of IL-17 secreting cells was significantly reduced, whereas IFN $\gamma$  induction was unaltered (Fig. 6A). In a set of experiments employing base of tail immunization, a significant effect of ASC-deficiency was again observed for IL-17 induction but not for IFN $\gamma$  secretion (Fig. 6B). Antibody responses were not altered in ASC<sup>-/-</sup> mice. Thus, the lack of ASC has less severe consequences for induction of Th responses by DDA/TDB than the loss of IL-1R signaling, indicating that inflammasome activation contributes to but does not completely account for generation of IL-1-dependent signaling through MyD88 *in vivo*.

### Discussion

Here we show that CMI induction upon immunization with the cationic adjuvant formulation DDA/TDB essentially requires MyD88 signaling. Our evidence for a TLR-independent role of MyD88 signaling in response to TDB stimulation is in line with data from Geisel et al. showing that cell recruitment and cytokine production induced by trehalose dimycolate was severely reduced in MyD88<sup>-/-</sup> mice but unaffected in TLR2<sup>-/-</sup> and TLR4<sup>-/-</sup>

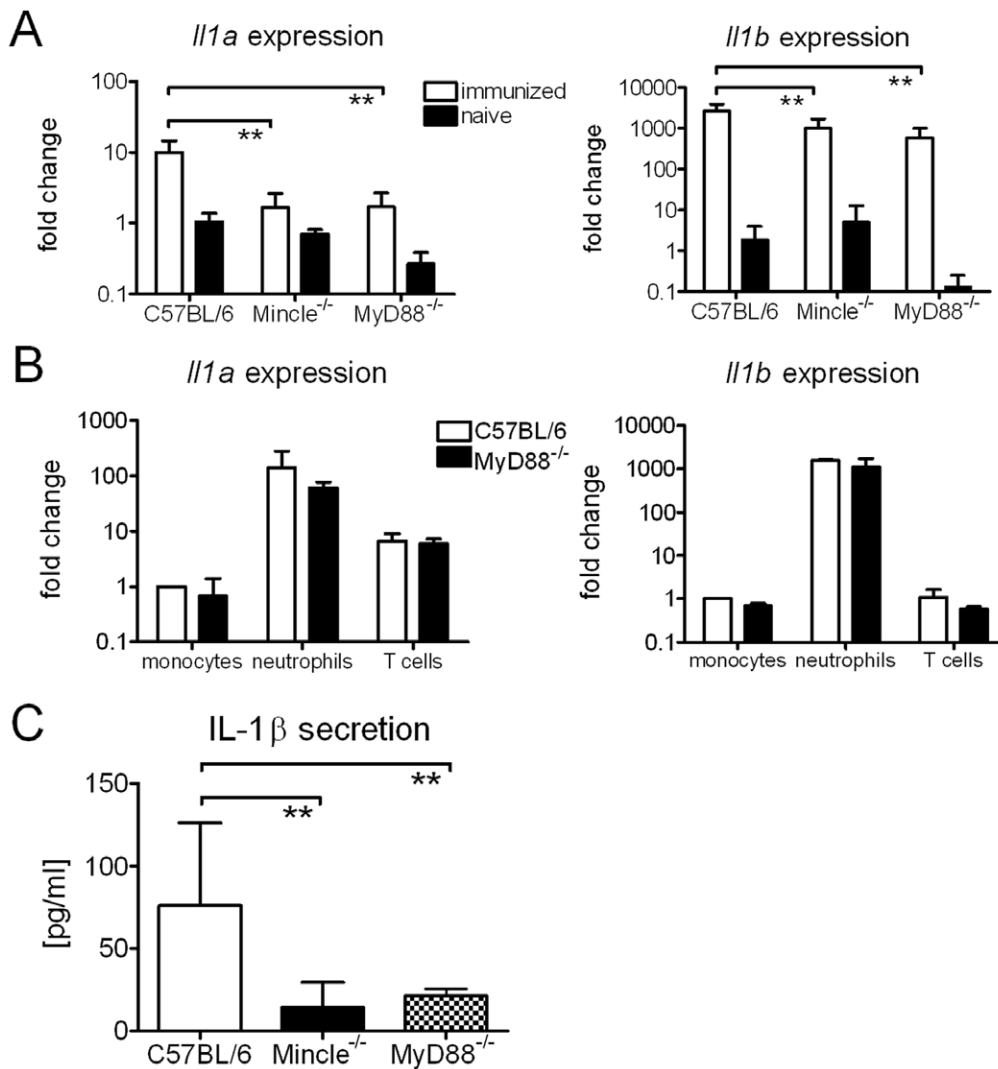

**Figure 3. TDB induces IL-1 expression and release *in vitro* and *in vivo*.** *Il1a* and *Il1b* expression determined by qRT-PCR in vaccinated and naive mice (A). RNA isolated from footpads 3 days post immunization. Fold change calculated against naive C57BL/6. Data presented as mean  $\pm$  SD pooled from 2 independent experiments with 2–3 mice/group. Expression of *Il1a* and *Il1b* in sorted immune cells from naive C57BL/6 and MyD88<sup>-/-</sup> mice (B). Fold change calculated against sorted monocytes from C57BL/6 mice. Data presented as mean and SD pooled from 2 independent sorts. IL-1 $\beta$  release of  $5 \times 10^5$  cells isolated from the footpad 7 days post immunization, cultured over night in medium (C). Data presented as mean  $\pm$  SD pooled from 3 independent experiments with 3 mice/group. doi:10.1371/journal.pone.0053531.g003

mice [20]. The strong MyD88-dependence observed here contrasts to the results obtained by Gavin et al. claiming that MyD88 is dispensable for generation of T cell dependent antibody responses upon vaccination with a range of adjuvants [21]. This discrepancy may be due to differences in the antigen (whole protein vs. haptent antigen) or the readout used (Th cell polarization vs. antibody responses).

We identified here IL-1/IL-1R1 as the TLR-independent MyD88 pathway significantly contributing to induction of Th1 and Th17 cellular immune responses upon vaccination with DDA/TDB. IL-1 has been linked to induction of pathogenic Th17 cells in an EAE model [22] but was also shown to induce protective Th17 immune responses using *Escherichia coli* heat-labile enterotoxin as adjuvant [23]. Furthermore IL-1 $\beta$  and IL-18 can promote IL-17 and IFN $\gamma$  production in CD4 and  $\gamma\delta$  T cells [24], in line with our data showing that both Th1 and Th17 induction is reduced in the absence of IL-1R1. Of note, CMI generation was

reduced in IL-1R1<sup>-/-</sup> mice to a lesser extent than in MyD88<sup>-/-</sup> mice, raising the question which other factors explain the strong MyD88-dependence. One possible explanation could be synergistic effects of IL-1 and IL-18, which promotes Th1 T cell differentiation together with IL-12 [25]. Lalor et al. also suggest redundancy for IL-1 $\beta$  and IL-18 in Th17 induction [24]. We did not detect reduced CMI induction in IL-18<sup>-/-</sup> mice where IL-1/IL-1R1 is still functional; however, local inflammation in the footpad was reduced in IL-18<sup>-/-</sup> as in MyD88<sup>-/-</sup> mice. Although IL-1R1 signaling was required for robust IFN $\gamma$  production by T cells, the Th1-associated IgG2a antibody response was unimpaired in IL-1R1<sup>-/-</sup> mice (Fig. 4). The basis for IL-1R1-independent, MyD88-dependent antigen-specific B cell responses is currently unknown; in future experiments, we plan to use conditional MyD88 transgenic mice to investigate the requirement for MyD88 in T and B lymphocytes, as well as myeloid cells, for efficient isotype switching.

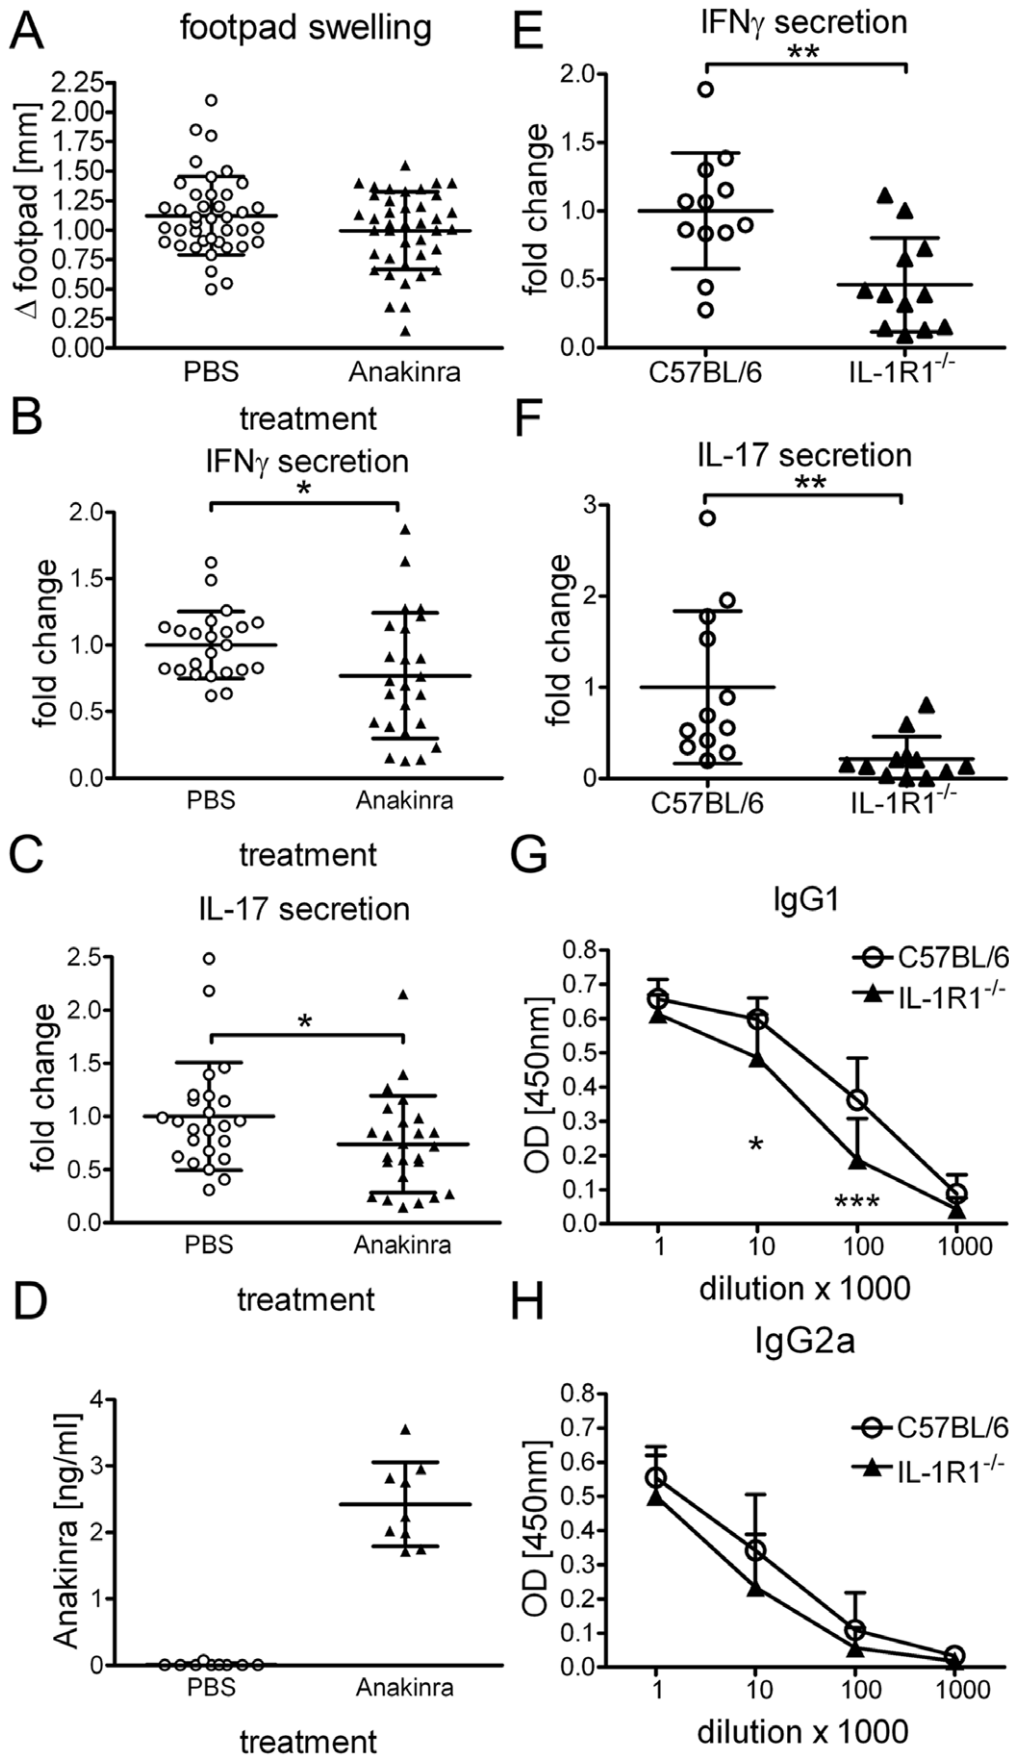

**Figure 4. IL-1R1 signaling contributes to DDA/TDB adjuvanticity.** Footpad swelling (A), IFN $\gamma$ , IL-17 (B, C) secretion of cells isolated from the draining lymph nodes and Anakinra serum concentration (D) 7 days post immunization. Daily injection of 100  $\mu$ g/g Anakinra or corresponding volume of PBS i.p.; first treatment 3–6 hours prior to immunization. Data presented as mean  $\pm$  SD pooled from 5 independent experiments with 4–5 mice/group; except (D). IFN $\gamma$ , IL-17 secretion of splenocytes (E, F) and H1-specific antibodies (G, H) in IL-1R1 $^{-/-}$  and C57BL/6 controls; base of tail immunization. Data presented as mean  $\pm$  SD pooled from 2 independent experiments with 5–6 mice/group.  
doi:10.1371/journal.pone.0053531.g004

In addition, the inducibility of Mincle by TLR ligands [10] raised the possibility that MyD88 $^{-/-}$  mice may be less responsive to TDB as adjuvant because of reduced receptor expression. However, our results showing that Mincle expression is also increased in MyD88 $^{-/-}$  mice upon immunization and that basal expression of Mincle in sorted monocytes, neutrophils and T cells is comparable between MyD88 $^{-/-}$  and C57BL/6 control mice (Fig. 2) allow us to discard this possibility. Instead, impaired responses to other cytokines and chemokines, e.g. IFN $\gamma$  [26] might contribute to the observed lack of responsiveness.

Unexpectedly, the adjuvant effect of DDA/TDB, even though dependent on IL-1/IL-1R1, was less strongly reliant on the inflammasome adaptor molecule ASC. Here again, DDA/TDB differed in the requirements for induction of immune responses compared to other known adjuvants, i.e. Alum which induces Th2 responses *via* Nlrp3-mediated inflammasome activation [27–29]. Schweneker et al. recently showed that TDB activates the Nlrp3 inflammasome in an ASC-dependent manner [30]. IL-1 $\beta$  secretion from bone marrow-derived DC upon stimulation with TDB was dependent on Caspase-1, Nlrp3 and ASC. It was further demonstrated that phagocytosis of TDB was a prerequisite for

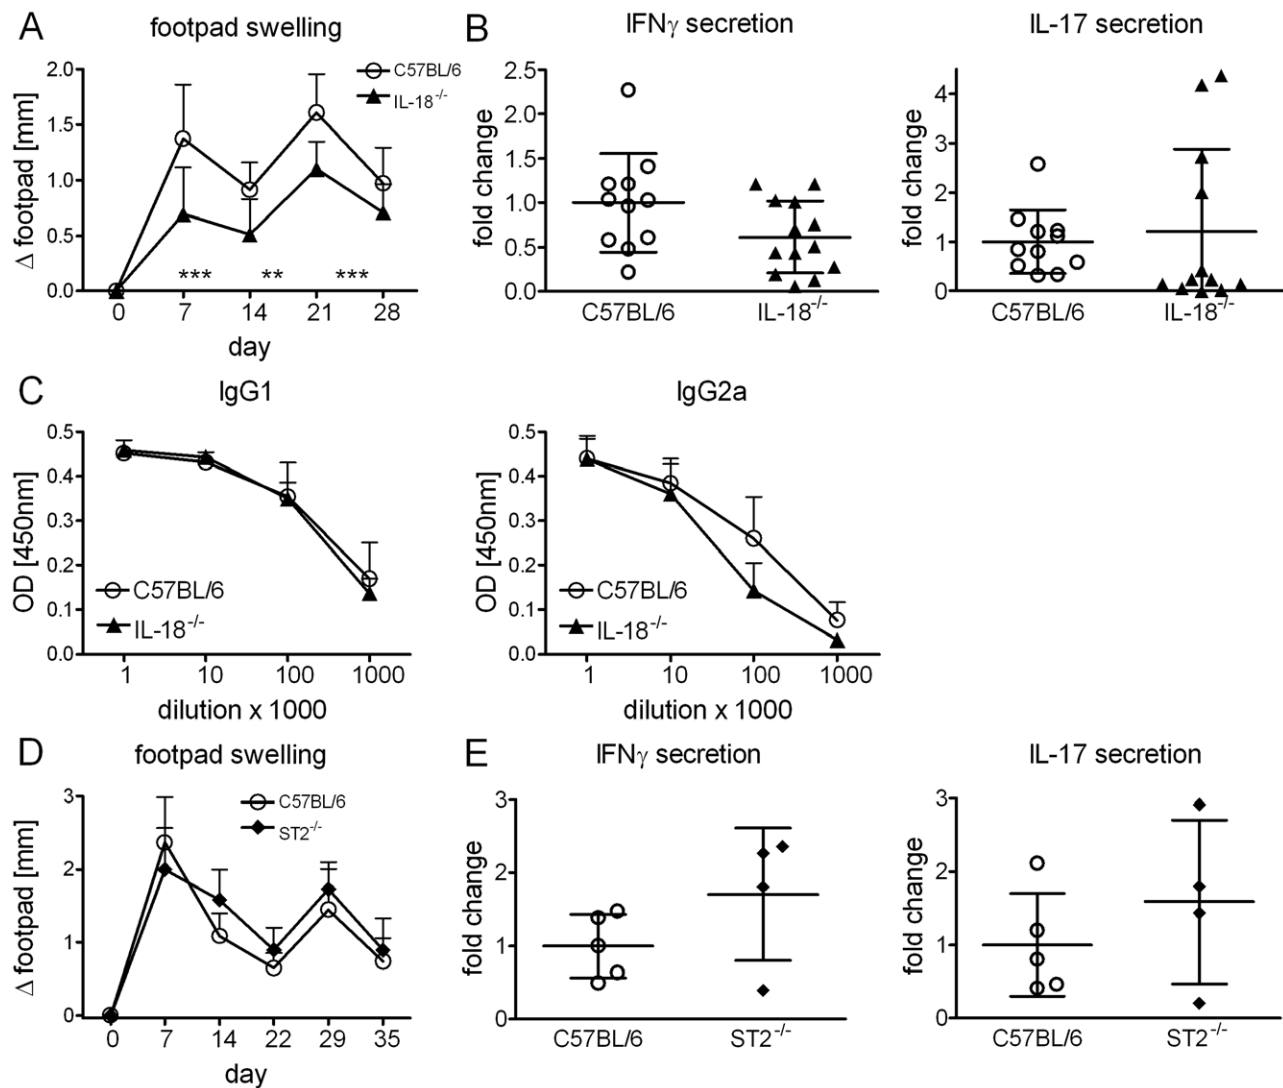

**Figure 5. IL-18 and IL-33 are dispensable for DDA/TDB adjuvanticity.** Footpad swelling (A), IFN $\gamma$ , IL-17 secretion of cells isolated from the draining lymph nodes (B) and H1-specific antibodies (C) in IL-18 $^{-/-}$  and C57BL/6 controls. Data presented as mean  $\pm$  SD pooled from 3 independent experiments with 3–5 mice/group. Footpad swelling (D), IFN $\gamma$  and IL-17 secretion of cells isolated from the draining lymph nodes in ST2 $^{-/-}$  and C57BL/6 controls (E). Immunization at day 0 and day 21, mice sacrificed at day 35. Data presented as mean  $\pm$  SD from 1 experiment with 4–5 mice/group.  
doi:10.1371/journal.pone.0053531.g005

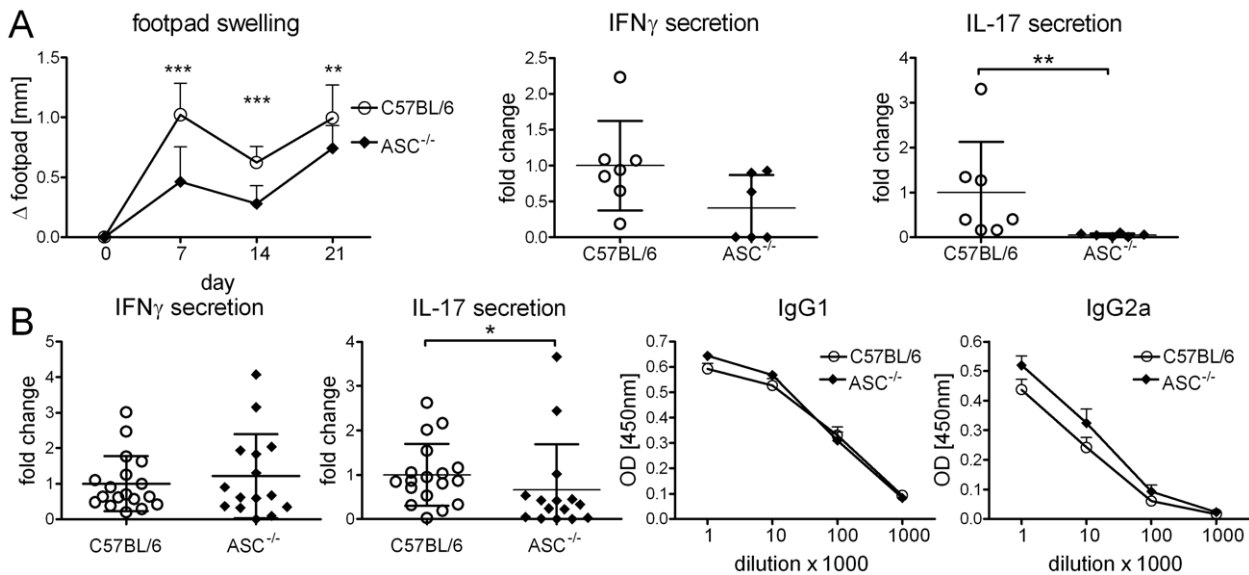

**Figure 6. Partial contribution of ASC to DDA/TDB adjuvanticity.** Footpad swelling, IFN $\gamma$  and IL-17 secretion in ASC<sup>-/-</sup> and C57BL/6 controls (A). Data presented as mean  $\pm$  SD pooled from 2 independent experiments with 3–5 mice/group. IFN $\gamma$ , IL-17 secretion and H1-specific antibodies in ASC<sup>-/-</sup> and C57BL/6 controls; base of tail immunization (B). Data presented as mean  $\pm$  SD pooled from 3 independent experiments with 5–6 mice/group. Re-stimulation of cells isolated from the draining lymph nodes. doi:10.1371/journal.pone.0053531.g006

inflammasome activation. This is in line with our data (Fig. S3) showing also Mincle- and ASC-dependent IL-1 $\beta$  secretion only upon stimulation with TDB in suspension, whereas *Il1b* expression was increased independent of uptake and inflammasome activation. However, in the context of vaccination with DDA/TDB, dependency on ASC was less pronounced as compared to the loss of IL-1R signaling. One possible explanation could be that neutrophils utilize serine proteases to cleave pro-IL-1 $\beta$  [31]. Massive neutrophil influx is a hallmark of DDA/TDB adjuvanticity (data not shown) and we detected very high expression of *Il1b* in sorted neutrophils isolated from naive C57BL/6 and MyD88<sup>-/-</sup> mice (Fig. 3B). Alternatively, ASC-independent non-canonical inflammasome activation via Caspase-11 and subsequent IL-1 $\alpha$  release [32] may be operating. IL-1 $\alpha$ , in contrast to IL-1 $\beta$ , is active as precursor as well as the calpain-cleaved mature form [33]. Gross et al. recently reported that particulate activators of Nlrp3 and strong inducers of calcium influx induced processing and secretion of IL-1 $\alpha$  in an inflammasome-independent manner [34]. We also detected high expression of *Il1a* in sorted neutrophils (Fig. 3B) isolated from naive C57BL/6 and MyD88<sup>-/-</sup> mice. Bone marrow-derived DC secreted IL-1 $\alpha$  upon stimulation with TDB in suspension in a Mincle- and MyD88-dependent, yet ASC-independent manner (Fig. S3B). As IL-1 $\alpha$  and IL-1 $\beta$  both bind to the IL-1R and are antagonized by Anakinra, ASC-independent release of IL-1 $\alpha$  may make an important contribution to DDA/TDB-induced Th induction.

Our results suggest the following scenario of induction and effects of IL-1 following TDB-adjuvanted immunization: 1. Recognition of TDB by Mincle triggers transcriptional upregulation of *Il1a* and *Il1b* mRNA, independent of MyD88 and ASC via Syk-Card9. 2. Uptake of TDB by DC (and possibly other myeloid cells) activates the Nlrp3 inflammasome and triggers IL-1 $\beta$  secretion in an ASC-dependent manner, whereas IL-1 $\alpha$  is released independent of ASC. 3. Both IL-1 proteins trigger IL-1R signaling via MyD88 to amplify inflammation at the site of injection and to direct Th differentiation to Th17 [35] and Th1 cells.

Taken together, we have shown here that the glycolipid adjuvant TDB relies on MyD88-dependent pathways for efficient Th1/Th17 adjuvanticity. Pharmacologic and genetic abrogation of IL-1R signaling identified IL-1 as the major MyD88-dependent factor induced by TDB through Mincle-Card9 signaling, providing new insight into the adjuvant mechanism. As DDA/TDB has entered clinical trials, further dissection of IL-1R-dependent effects on innate and adaptive immune cells will be relevant for a detailed understanding of the molecular mode of action of this adjuvant.

## Materials and Methods

### Ethics Statement

All procedures were discussed with and approved by the animal protection committees of regional Bavarian governments (Regierung von Mittelfranken or Oberbayern animal protocols number 54-2532.1.12/09 and 211-2531-33/05) according to German animal protection law (BGBl I S. 1206, 1313).

### Mice

MyD88<sup>-/-</sup> mice were used with permission of Dr. S. Akira [11], Mincle<sup>-/-</sup> mice have been described [36]. IL-1R1<sup>-/-</sup> and ASC<sup>-/-</sup> mice were bred at the Technische Universität München. ASC<sup>-/-</sup> were originally generated at Genentech [19]. C57BL/6, Mincle<sup>-/-</sup>, MyD88<sup>-/-</sup>, ST2<sup>-/-</sup>, IL-18<sup>-/-</sup> and TLR9<sup>-/-</sup> mice were bred at the animal facility of the Medical Faculty in Erlangen. For some experiments, C57BL/6 mice were purchased from Harlan or Charles River.

### Immunization and IL-1 Receptor Blockade

DDA/TDB liposomes and recombinant H1 were provided by the Statens Serum Institut. Adjuvant formulations were prepared as described [2]. Mice were immunized twice in a 14-day interval unless otherwise stated. IL-1 receptor signaling was blocked by intraperitoneal injection of 100  $\mu$ g/g body weight soluble IL-1 receptor antagonist Anakinra (Kineret, Amgen) daily. Since

Anakinra had to be given daily and previous experiments showed IFN $\gamma$  and IL-17 production could be detected 7 days after a single immunization [6], we chose a 7-day immunization protocol. Anakinra serum concentration was determined by sandwich ELISA using anti-human IL-1-RA antibodies (BioLegend).

### Antigen-specific Restimulation and Detection of H1-specific Antibodies

Mice were sacrificed two weeks after the second immunization unless stated otherwise. Pooled draining inguinal and popliteal lymph nodes or spleens were meshed through a 100  $\mu$ m nylon sieve and  $5 \times 10^5$  cells were restimulated with 10  $\mu$ g/ml H1 protein for 96 hours. Supernatants were analyzed for IFN $\gamma$  and IL-17 production by ELISA (R&D Systems). Background (unstimulated cells) was subtracted and cytokine release expressed as fold change relative to the mean response of restimulated cells from immunized control mice. We chose to present summarized data as fold change in order to account for inter-experimental variation in overall cytokine production because experiments were conducted in different laboratories and with mice from different animal houses. Serum was analyzed in tenfold dilutions (starting from 1/1,000) for H1-specific antibodies with rabbit anti-mouse IgG1 and IgG2a (BD Biosciences). Pooled serum from immunized mice was included on each ELISA plate as a positive inter-assay control.

### Intracellular Cytokine Staining

$2 \times 10^6$  cells isolated from draining lymph nodes 7 days after the second immunization were re-stimulated with a mixture of 10  $\mu$ g/ml H1 protein and 5  $\mu$ g/ml of the peptides: Ag85B CD8 epitope (p1–19): FSRPGLPVEYLQVPSMGM, Ag85B CD4 epitope (p241–255): QDAYNA-AGGHNAVFN, Ag85B CD4 epitope (p261–280): THSWEYWGQAQLNAMKGDLS and ESAT-6 (p1–15): MTEQQWNFAGIEAAA. After 1 h 10  $\mu$ g/ml Brefeldin A was added and incubation continued for 23 h. PMA (50 ng/ml)/ionomycin (1  $\mu$ g/ml) was used as a positive and culture medium as negative controls. Intracellular cytokine staining was performed according to standard protocols with antibodies against CD3, CD4, CD8, NK1.1,  $\gamma\delta$  TCR, CD11b, IFN $\gamma$  and IL-17 (eBioscience or BioLegend) and data recorded on a FACSCanto II (BD Biosciences).

### Generation and Stimulation of Bone Marrow-derived DC

Bone marrow cells were cultured on Petri dishes for 8 days in cRPMI containing 10% X63-cell conditioned medium.  $2.5 \times 10^5$  cells/ml (cytokine secretion) or  $5 \times 10^5$  cells/ml (qRT-PCR) were stimulated as indicated with plate coated TDB [2] or TDB in suspension (TDB suspended in DMEM by vortexing, heating to 60°C and 10 min sonication). IL-1 $\alpha$  and IL-1 $\beta$  release was determined by ELISA (eBioscience).

### Single Cell Isolation from Footpad

The injection site was excised using a scalpel and snap frozen in liquid nitrogen for qRT-PCR analysis. RNA was isolated using TriFast (peqlab) according to the manufacturer's protocol. For IL-1 $\beta$  release single cell suspensions were obtained using gentle-MACS (Miltenyi Biotec) according to the manufacturer's protocol and  $5 \times 10^5$  cells cultured in 200  $\mu$ l cDMEM over night.

### Quantitative RT-PCR

Expression levels of the housekeeping gene *Hprt* as well as *Il1a*, *Il1b*, *Csf3* and *Mincle* were analyzed using primer/probe combinations selected from the Roche Universal Probe Library. Fold

changes were calculated with the  $\Delta\Delta$ CT method using calibrators as indicated.

### Cell Sorting

Single cell suspensions from bone marrow and spleen were stained with antibodies against CD11b, Ly6C, Ly6G (bone marrow) or CD3, CD19 (spleen); all antibodies from eBioscience. Monocytes (CD11b<sup>+</sup>Ly6C<sup>+</sup>Ly6G<sup>-</sup>), neutrophils (CD11b<sup>+</sup>Ly6C<sup>+</sup>Ly6G<sup>+</sup>) and T cells (CD3<sup>+</sup>CD19<sup>-</sup>) were sorted on a MoFlo (Beckman Coulter).  $5 \times 10^5$ – $1 \times 10^6$  sorted cells were lysed in TriFast for RNA isolation and qRT-PCR.

### Phagocytosis and Spreading Assay

Spreading assay of bone marrow-derived macrophages (BMM) was performed as described [37]. For phagocytosis assays BMM were incubated with green fluorescent latex beads (1  $\mu$ m; Flouresbrite Microparticles, Polyscience, Inc.) with an MOI of 20 and incubated for 1 h or 4 h at 37°C. Cells were washed twice with ice cold PBS, detached from the 24 well plate by using a cell scraper and resuspended in PBS containing 0.2% BSA. Percentages of living cells which had phagocytosed beads were determined using a FACSCanto II (BD Biosciences).

### Statistical Analysis

Statistical analysis was performed using Prism 5 from GraphPad Software, Inc. Significance was determined by 2-way ANOVA with Bonferroni correction for footpad swelling and H1-specific antibodies. For cytokine secretion normal distribution was tested by Shapiro-Wilk followed by unpaired student's t-test for Gaussian or Mann-Whitney for non-Gaussian distribution. \* $p < 0.05$ , \*\* $p < 0.01$  and \*\*\* $p < 0.001$ .

### Supporting Information

**Figure S1 IFN $\gamma$  and IL-17 are secreted by *bona fide* Th1 and Th17 cells.** Number of IFN $\gamma$  (A) and IL-17 (B) secreting cells determined by intracellular cytokine staining. Cells isolated from draining popliteal lymph nodes 7 days after the second immunization (footpad).  $2 \times 10^6$  cells per well, 24 h incubation with 10  $\mu$ g/ml H1, PMA/Ionomycin or medium control in the presence of Brefeldin A. IFN $\gamma$  (C) and IL-17 (D) release of the same cells ( $5 \times 10^5$ ) stimulated for 96 h without Brefeldin A. One of two representative experiments with 2 mice/group shown. (TIF)

**Figure S2 TLR2,3,4,7 and 9 seem dispensable for DDA/TDB adjuvanticity.** Footpad swelling, IFN $\gamma$  and IL-17 secretion in TLR2,3,4,7<sup>-/-</sup> and C57BL/6 controls (A). Data presented as mean  $\pm$  SD from 1 experiment with 3 mice/group. Footpad swelling, IFN $\gamma$  and IL-17 secretion in TLR9<sup>-/-</sup> and C57BL/6 controls (B). Data presented as mean  $\pm$  SD from 3 independent experiments with 3–5 mice/group. Cytokine production of cells isolated from the draining lymph nodes. (TIF)

**Figure S3 TDB-induced expression and release of IL-1 $\alpha$  and IL-1 $\beta$ .** Expression of *Il1a*, *Il1b* and *Csf3* (A), and IL-1 $\alpha$  and IL-1 $\beta$  secretion (B). Bone marrow-derived DC were stimulated for 24 h with plate-coated TDB (solvent control isopropanol) or TDB in suspension.  $2.5 \times 10^5$  cells/well were seeded for cytokine release (TDB concentration as indicated) and  $5 \times 10^5$  cells/well for qRT-PCR (5  $\mu$ g/ml TDB). Fold change calculated against DC from C57BL/6 mice in medium. One experiment performed in duplicates. (TIF)



**Figure S4 ASC<sup>-/-</sup> macrophages show no defects in spreading kinetics and phagocytosis capacity.** Spreading kinetics (A) of C57BL/6 (circles) and ASC<sup>-/-</sup> (squares) BMM stimulated with LPS (closed symbols) or media control (open symbols). Mean ± SEM of at least 300 cells per condition. Statistical significance refers to the comparison of LPS stimulated C57BL/6 and ASC<sup>-/-</sup> BMM. One experiment performed. Phagocytosis capacity of C57BL/6 (B) and ASC<sup>-/-</sup> (C) BMM. Cells were incubated with fluorescent latex beads (1 μm; MOI 20) for 1 h and 4 h. Percentages of cells which phagocytosed beads determined flow cytometry. One of two representative experiments shown. (TIF)

## References

1. Davidsen J, Rosenkrands I, Christensen D, Vangala A, Kirby D, et al. (2005) Characterization of cationic liposomes based on dimethyldioctadecylammonium and synthetic cord factor from *M. tuberculosis* (trehalose 6,6'-dibehenate)-a novel adjuvant inducing both strong CMI and antibody responses. *Biochim Biophys Acta* 1718: 22–31.
2. Werninghaus K, Babiak A, Gross O, Holscher C, Dietrich H, et al. (2009) Adjuvanticity of a synthetic cord factor analogue for subunit *mycobacterium tuberculosis* vaccination requires FeRγ-syk-card9-dependent innate immune activation. *J Exp Med* 206: 89–97.
3. Kaufmann SH, Hussey G, Lambert PH (2010) New vaccines for tuberculosis. *Lancet* 375: 2110–2119.
4. Ottenhoff TH, Doherty TM, van Dissel JT, Bang P, Lingnau K, et al. (2010) First in humans: A new molecularly defined vaccine shows excellent safety and strong induction of long-lived *mycobacterium tuberculosis*-specific TH1-cell like responses. *Hum Vaccin* 6: 1007–1015.
5. Ishikawa E, Ishikawa T, Morita YS, Toyonaga K, Yamada H, et al. (2009) Direct recognition of the mycobacterial glycolipid, trehalose dimycolate, by C-type lectin mincle. *J Exp Med* 206: 2879–2888.
6. Schoenen H, Bodendorfer B, Hitchens K, Manzanero S, Werninghaus K, et al. (2010) Cutting edge: Mincle is essential for recognition and adjuvanticity of the mycobacterial cord factor and its synthetic analog trehalose-dibehenate. *J Immunol* 184: 2756–2760.
7. Agger EM, Rosenkrands I, Hansen J, Brahimki M, Vandahl BS, et al. (2008) Cationic liposomes formulated with synthetic mycobacterial cordfactor (CAF01): A versatile adjuvant for vaccines with different immunological requirements. *PLoS One* 3: e3116.
8. Lindstrom T, Agger EM, Korsholm KS, Darrah PA, Aagaard C, et al. (2009) Tuberculosis subunit vaccination provides long-term protective immunity characterized by multifunctional CD4 memory T cells. *J Immunol* 182: 8047–8055.
9. Lindstrom T, Woodworth J, Dietrich J, Aagaard C, Andersen P, et al. (2012) Vaccine-induced Th17 cells are maintained long-term postvaccination as a distinct and phenotypically stable memory subset. *Infection & Immunity* 80: 3533–3544.
10. Matsumoto M, Tanaka T, Kaisho T, Sanjo H, Copeland NG, et al. (1999) A novel LPS-inducible C-type lectin is a transcriptional target of NF-IL6 in macrophages. *J Immunol* 163: 5039–5048.
11. Adachi O, Kawai T, Takeda K, Matsumoto M, Tsutsui H, et al. (1998) Targeted disruption of the myd88 gene results in loss of IL-1- and IL-18-mediated function. *Immunity* 9: 143–150.
12. Muzio M, Ni J, Feng P, Dixit VM (1997) IRAK (pelle) family member IRAK-2 and MyD88 as proximal mediators of IL-1 signaling. *Science* 278: 1612–1615.
13. Schmitz J, Owyang A, Oldham E, Song Y, Murphy E, et al. (2005) IL-33, an interleukin-1-like cytokine that signals via the IL-1 receptor-related protein ST2 and induces T helper type 2-associated cytokines. *Immunity* 23: 479–490.
14. Wesche H, Henzel WJ, Shillinglaw W, Li S, Cao Z (1997) MyD88: An adapter that recruits IRAK to the IL-1 receptor complex. *Immunity* 7: 837–847.
15. Ghayur T, Banerjee S, Hugunin M, Butler D, Herzog L, et al. (1997) Caspase-1 processes IFN-gamma-inducing factor and regulates LPS-induced IFN-gamma production. *Nature* 386: 619–623.
16. Martinon F, Burns K, Tschopp J (2002) The inflammasome: A molecular platform triggering activation of inflammatory caspases and processing of proIL-1beta. *Mol Cell* 10: 417–426.
17. Ippagunta SK, Malireddi RK, Shaw PJ, Neale GA, Walle LV, et al. (2011) The inflammasome adaptor ASC regulates the function of adaptive immune cells by controlling Dock2-mediated ract activation and actin polymerization. *Nat Immunol* 12: 1010–1016.
18. Ippagunta SK, Malireddi RK, Shaw PJ, Neale GA, Walle LV, et al. (2012) Addendum: Defective Dock2 expression in a subset of ASC-deficient mouse lines. *Nat Immunol* 13: 701–702.
19. Mariathasan S, Newton K, Monack DM, Vucic D, French DM, et al. (2004) Differential activation of the inflammasome by caspase-1 adaptors ASC and IPAF. *Nature* 430: 213–218.
20. Geisel RE, Sakamoto K, Russell DG, Rhoades ER (2005) In vivo activity of released cell wall lipids of *mycobacterium bovis* bacillus calmette-guerin is due principally to trehalose mycolates. *J Immunol* 174: 5007–5015.
21. Gavin AL, Hoebe K, Duong B, Ota T, Martin C, et al. (2006) Adjuvant-enhanced antibody responses in the absence of toll-like receptor signaling. *Science* 314: 1936–1938.
22. Sutton C, Brereton C, Keogh B, Mills KH, Lavelle EC (2006) A crucial role for interleukin (IL)-1 in the induction of IL-17-producing T cells that mediate autoimmune encephalomyelitis. *J Exp Med* 203: 1685–1691.
23. Brereton CF, Sutton CE, Ross PJ, Iwakura Y, Pizza M, et al. (2011) *Escherichia coli* heat-labile enterotoxin promotes protective Th17 responses against infection by driving innate IL-1 and IL-23 production. *J Immunol* 186: 5896–5906.
24. Lalor SJ, Dungan LS, Sutton CE, Basdeo SA, Fletcher JM, et al. (2011) Caspase-1-processed cytokines IL-1β and IL-18 promote IL-17 production by gamma delta and CD4 T cells that mediate autoimmunity. *J Immunol* 186: 5738–5748.
25. Okamura H, Tsutsi H, Komatsu T, Yutsudo M, Hakura A, et al. (1995) Cloning of a new cytokine that induces IFN-gamma production by T cells. *Nature* 378: 88–91.
26. Sun D, Ding A (2006) MyD88-mediated stabilization of interferon-gamma-induced cytokine and chemokine mRNA. *Nat Immunol* 7: 375–381.
27. Eisenbarth SC, Colegio OR, O'Connor W, Sutterwala FS, Flavell RA (2008) Crucial role for the Nalp3 inflammasome in the immunostimulatory properties of aluminium adjuvants. *Nature* 453: 1122–1126.
28. Kool M, Soullie T, van Nimwegen M, Willart MA, Muskens F, et al. (2008) Alum adjuvant boosts adaptive immunity by inducing uric acid and activating inflammatory dendritic cells. *J Exp Med* 205: 869–882.
29. Li H, Willingham SB, Ting JP, Re F (2008) Cutting edge: Inflammasome activation by alum and alum's adjuvant effect are mediated by Nlrp3. *J Immunol* 181: 17–21.
30. Schwenecker K, Gorka O, Schwenecker M, Poock H, Tschopp J, et al. (2012) The mycobacterial cord factor adjuvant analogue trehalose-6,6'-dibehenate (TDB) activates the Nlrp3 inflammasome. *Immunobiology*: DOI 10.1016/j.imbio.2012.07.029.
31. Greten FR, Arkan MC, Bollrath J, Hsu LC, Goode J, et al. (2007) NF-kappaB is a negative regulator of IL-1beta secretion as revealed by genetic and pharmacological inhibition of IKKbeta. *Cell* 130: 918–931.
32. Kayagaki N, Warming S, Lamkanfi M, Walle LV, Louie S, et al. (2011) Non-canonical inflammasome activation targets Caspase-11. *Nature* 479: 117–121.
33. Dinarello CA (2011) Interleukin-1 in the pathogenesis and treatment of inflammatory diseases. *Blood* 117: 3720–3732.
34. Gross O, Yazdi AS, Thomas CJ, Masin M, Heinz LX, et al. (2012) Inflammasome activators induce Interleukin-1alpha secretion via distinct pathways with differential requirement for the protease function of Caspase-1. *Immunity* 36: 388–400.
35. Chung Y, Chang SH, Martinez GJ, Yang XO, Nurieva R, et al. (2009) Critical regulation of early Th17 cell differentiation by Interleukin-1 signaling. *Immunity* 30: 576–587.
36. Wells CA, Salvage-Jones JA, Li X, Hitchens K, Butcher S, et al. (2008) The macrophage-inducible C-type lectin, mincle, is an essential component of the innate immune response to *candida albicans*. *J Immunol* 180: 7404–7413.
37. Wenzel J, Held C, Palmisano R, Teufel S, David JP, et al. (2011) Measurement of TLR-induced macrophage spreading by automated image analysis: Differential role of MyD88 and MAPK in early and late responses. *Front Physiol* 2: 71.

## Acknowledgments

We would like to acknowledge the assistance of the Core Unit Cell Sorting and Immunomonitoring Erlangen. Ag85B and ESAT-6 peptides were kindly provided by Prof. J. Eichler, Department of Chemistry and Pharmacy, University of Erlangen-Nürnberg. Support from H. Wagner, D. Busch and C. Bogdan is greatly acknowledged. We thank Manfred Kirsch and Claudia Dietz for excellent animal care.

## Author Contributions

Conceived and designed the experiments: CD KW RL. Performed the experiments: CD KW MR KJ NR JW. Analyzed the data: CD KW RL JW. Contributed reagents/materials/analysis tools: US DC SW CK EMA CPdC. Wrote the paper: CD MR CPdC RL.
